# Supplementary material for: Population pharmacokinetic analysis of enrofloxacin and its active metabolite ciprofloxacin after intravenous injection to cats with reduced kidney function
Source: PubMed Central journal article supplement (PMC10658592; doi:10.1111/jvim.16866), 2023-09-20

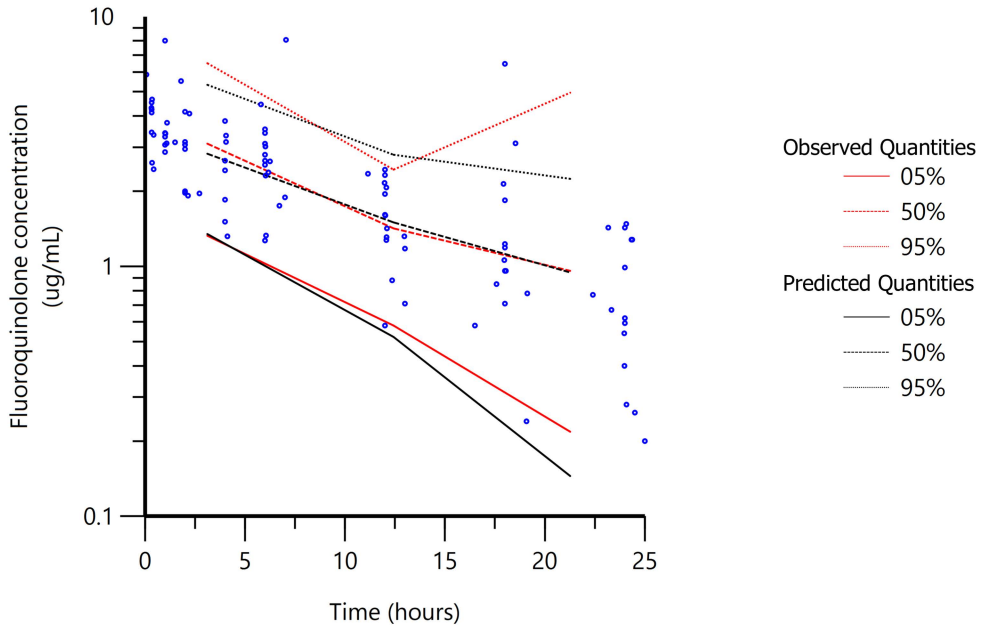

Supplement: JVIM-37-2230-s001.pdf [file JVIM-37-2230-s001.pdf]
