# Supplementary material for: Population pharmacokinetic analysis of enrofloxacin and its active metabolite ciprofloxacin after intravenous injection to cats with reduced kidney function
Source: PubMed Central journal article supplement (PMC10658592; doi:10.1111/jvim.16866), 2023-09-20
Supplement: JVIM-37-2230-s003.pdf [file JVIM-37-2230-s003.pdf]

**Supplemental Table 2. Results of 300 bootstrap simulations and original model estimates.**

| Parameter       | Bootstrap Mean<br>Observation | Model<br>Estimate | Value    | Model<br>Std Err | Bootstrap<br>CV% | Model<br>CV% |
|-----------------|-------------------------------|-------------------|----------|------------------|------------------|--------------|
| $\theta V_{d1}$ | 4875.4                        | 4793.26           | mL/kg    | 327.84           | 9.56             | 6.84         |
| $V_{d2}$        | $2.1 \times 10^5$             | 2222.57           | mL/kg    | 1123.14          | 1677.84          | 50.53        |
| $\theta Cl1$    | 236.7                         | 234.82            | mL/kg/hr | 45.86            | 209.2            | 19.53        |
| $Cl2$           | 254.87                        | 190.65            | mL/kg/hr | 53.41            | 400.62           | 28.02        |
| $dV_{d1}weight$ | 1.29                          | 0.97              |          | 0.22             | 29.02            | 22.72        |
| $dCl1weight$    | 1.93                          | 1.33              |          | 0.45             | 59.52            | 33.88        |

$\theta V_{d1}$  is the theta (typical value) for quinolone volume of distribution of the first compartment;  $V_{d2}$  is the volume of distribution of quinolone within the second compartment;  $\theta Cl1$  is the theta for quinolone clearance from the first compartment;  $Cl2$  is the clearance of quinolone from the second compartment;  $dV_{d1}weight$  is the effect of the covariate weight on the volume of distribution of the first compartment;  $dCl1weight$  is the effect of the covariate weight on the quinolone clearance of the first compartment.
