# Supplementary material for: Population pharmacokinetic analysis of enrofloxacin and its active metabolite ciprofloxacin after intravenous injection to cats with reduced kidney function
Source: PubMed Central journal article supplement (PMC10658592; doi:10.1111/jvim.16866), 2023-09-20
Supplement: JVIM-37-2230-s004.pdf [file JVIM-37-2230-s004.pdf]

**Supplemental Table 1. Sparse sampling grid.** An “X” in the grid indicates a time that a blood sample was obtained following administration of 5 mg/kg enrofloxacin intravenously at time 0 (timer began at the completion of the enrofloxacin infusion).

| <b>Schedule</b> | <b>20 min</b> | <b>1 hr</b> | <b>2 hr</b> | <b>4 hr</b> | <b>6 hr</b> | <b>12 hr</b> | <b>18 hr</b> | <b>24 hr</b> |
|-----------------|---------------|-------------|-------------|-------------|-------------|--------------|--------------|--------------|
| 1               | X             | X           |             |             | X           |              |              |              |
| 2               |               |             | X           |             | X           |              | X            |              |
| 3               |               | X           |             |             |             | X            |              | X            |
| 4               | X             |             |             | X           |             |              |              | X            |
| 5               | X             |             |             |             |             | X            |              | X            |
| 6               |               |             |             | X           |             | X            |              | X            |
| 7               |               | X           |             |             | X           |              | X            |              |
